# Supplementary material for: The role and mechanism of macrophage autophagy in the experimental model of chronic obstructive pulmonary disease
Source: PubMed Central journal article supplement (PMC11037029; doi:10.18332/tid/186403), 2024-04-23
Supplement: TID-22-67-s1.pdf [file TID-22-67-s1.pdf]

## Supplementary Figures

Figure2:

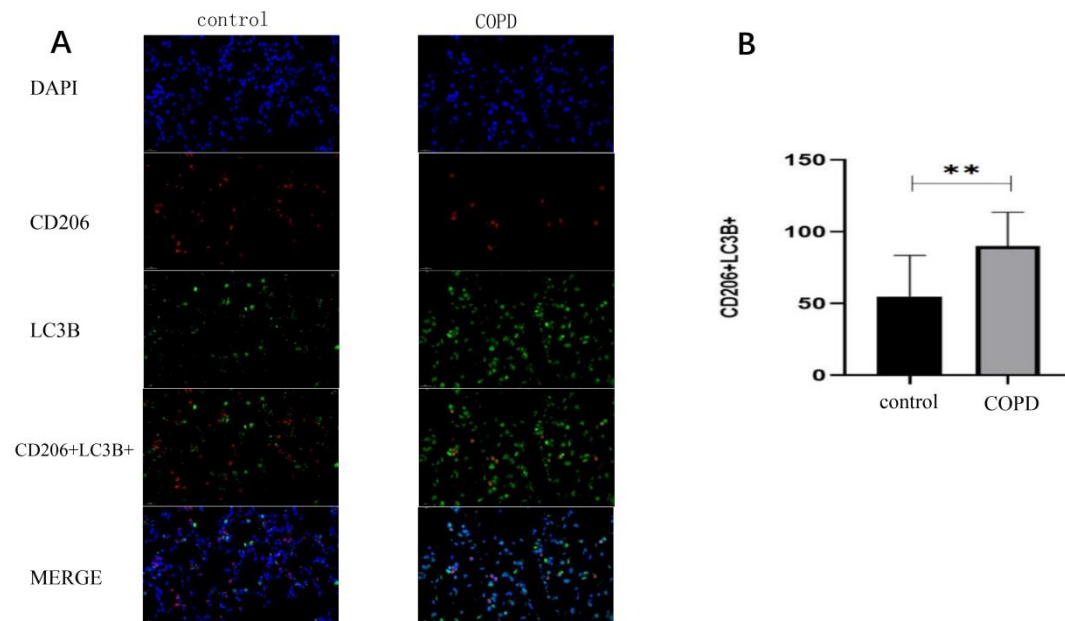

Figure 2: Changes in the number of M2-type macrophage-associated autophagy-positive cells in lung tissues of mice from control group and COPD model group. The number of CD206+LC3B+ double positive cells was determined by dual immunofluorescence method. CD206 was used as the marker of M2 macrophage and LC3B was used as the marker of autophagy. A: Double immunofluorescence staining of labeled lung tissue, using CD206 to label M2 macrophages, LC3B to label autophagy-associated protein (400×magnification). B: Changes in the number of CD206+LC3B+ cells in the control and COPD model groups. n=3 experiments, \*\*P < 0.05.

Figure3:

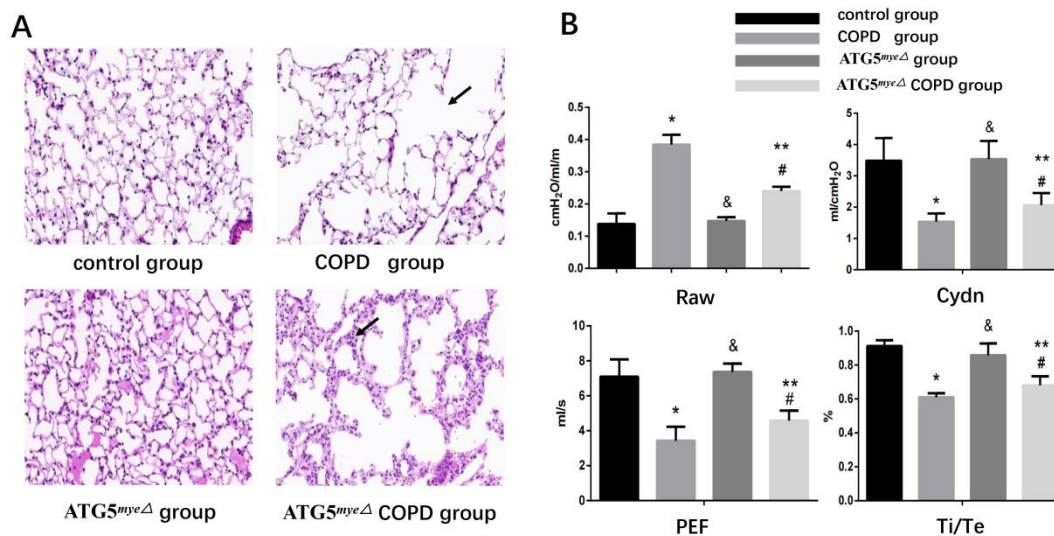

Figure 3: Effects of macrophage autophagy on lung morphology and lung function in COPD mice. Construction of ATG5<sup>myeΔ</sup> mice, fumigation combined with intraperitoneal injection of CSE method to construct COPD animal

model, divided into control group, COPD group,  $ATG5^{mye\Delta}$  group and  $ATG5^{mye\Delta}$ COPD group. A: morphological changes of lung tissue by HE staining in control group, COPD group,  $ATG5^{mye\Delta}$  group and  $ATG5^{mye\Delta}$ COPD group. compared with the control group, the wild COPD group and  $ATG5^{mye\Delta}$ COPD group showed broken and fractured alveolar walls, forming larger cavities, showing obvious emphysematous changes, the lung inflammatory cell infiltration was increased in  $ATG5^{mye\Delta}$ COPD mice compared with the wild-type COPD group mice (black arrows; magnification,  $\times 400$ ); B: changes in lung function-related indexes of mice in control group, COPD group,  $ATG5^{mye\Delta}$  group and  $ATG5^{mye\Delta}$ COPD group. n=3 experiments, \*P < 0.05, compared with the control group; &P > 0.05, compared with the control group; \*\*P < 0.05, compared with the COPD group; #P < 0.05, compared with the  $ATG5^{mye\Delta}$  group.

Figure4:

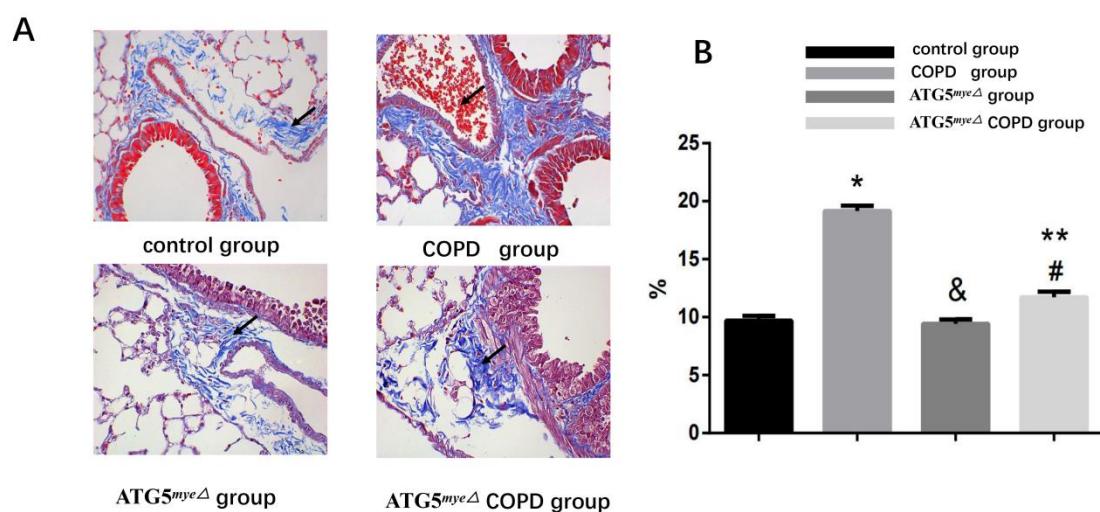

Figure 4: Effect of macrophage autophagy on small airway remodeling in COPD. Construction of  $ATG5^{mye\Delta}$  mice, fumigation combined with intraperitoneal injection of CSE method to construct COPD animal model, divided into control group, COPD group,  $ATG5^{mye\Delta}$  group and  $ATG5^{mye\Delta}$ COPD group. A: morphological changes of mouse lung tissue after masson staining in control group, COPD group,  $ATG5^{mye\Delta}$  group and  $ATG5^{mye\Delta}$  group (blue stain, black arrows; magnification,  $\times 400$ ); B: collagen volume fraction (CVF) after staining by masson staining method in control group, COPD group,  $ATG5^{mye\Delta}$  group and  $ATG5^{mye\Delta}$  group. n=3 experiments, \*P < 0.05, compared with the control group; &P > 0.05, compared with the control group; \*\*P < 0.05, compared with the COPD group; #P < 0.05, compared with the  $ATG5^{mye\Delta}$  group.

Figure5:

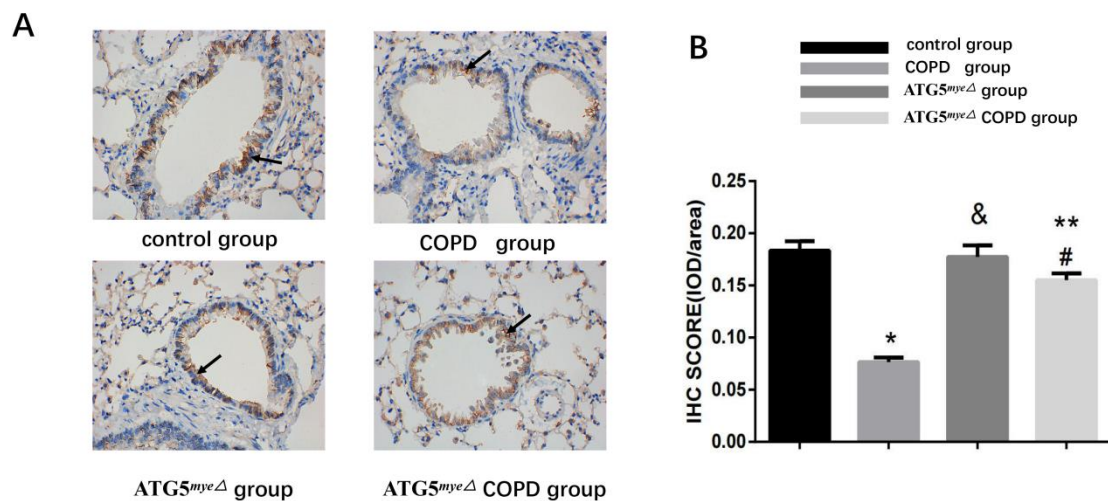

Figure 5: Effect of macrophage autophagy on expression of E-cadherinb in COPD. Construction of ATG5<sup>myeΔ</sup> mice, fumigation combined with intraperitoneal injection of CSE method to construct COPD animal model, divided into control group, COPD group, ATG5<sup>myeΔ</sup> group and ATG5<sup>myeΔ</sup> COPD group. A: changes in E-cadherin expression in lung tissues of mice in control group, COPD group, ATG5<sup>myeΔ</sup> group and ATG5<sup>myeΔ</sup> group (brown stain, black arrows; magnification, ×400); B: quantitative changes in E-cadherin expression in lung tissues of mice in control group, COPD group, ATG5<sup>myeΔ</sup> group and ATG5<sup>myeΔ</sup> group. n=3 experiments, \*P < 0.05, compared with the control group; &P > 0.05, compared with the control group; \*\*P < 0.05, compared with the COPD group; #P < 0.05, compared with the ATG5<sup>myeΔ</sup> group.

Figure6:

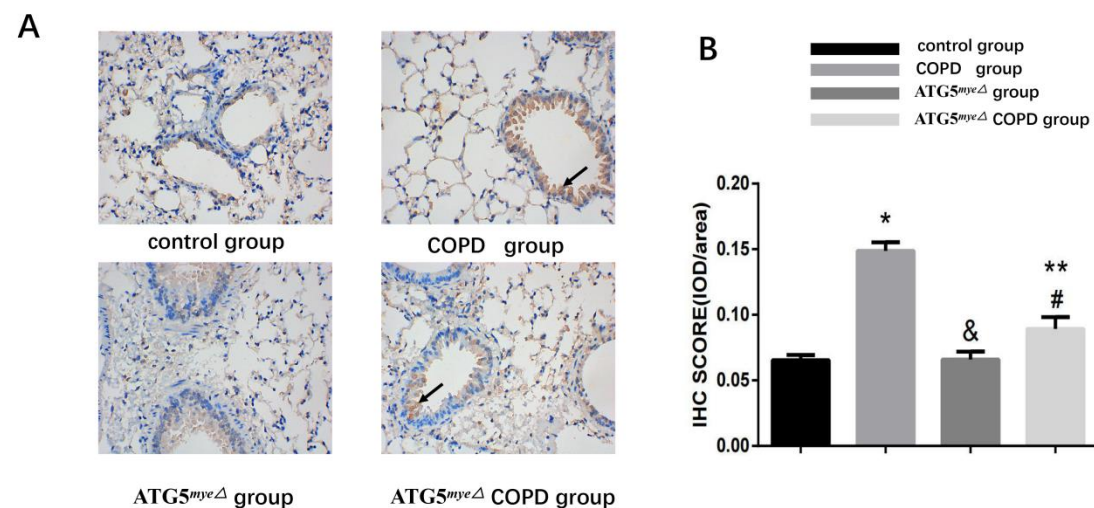

Figure 6: Effect of macrophage autophagy on expression of N-cadherinb in COPD. Construction of ATG5<sup>myeΔ</sup> mice, fumigation combined with intraperitoneal injection of CSE method to construct COPD animal model, divided into control group, COPD group, ATG5<sup>myeΔ</sup> group and ATG5<sup>myeΔ</sup> COPD group. A: Changes in N-cadherin expression in lung tissues of mice in control group, COPD group, ATG5<sup>myeΔ</sup> group and ATG5<sup>myeΔ</sup> group (brown stain, black arrows; magnification, ×400); B: Quantitative changes in N-cadherin expression in lung tissues of mice in control group, COPD group, ATG5<sup>myeΔ</sup> group and ATG5<sup>myeΔ</sup> group. n=3 experiments, \*P < 0.05, compared with the control group;

&P > 0.05, compared with the control group; \*\*P < 0.05, compared with the COPD group; #P < 0.05, compared with the ATG5<sup>mye</sup>Δ group.

Figure7:

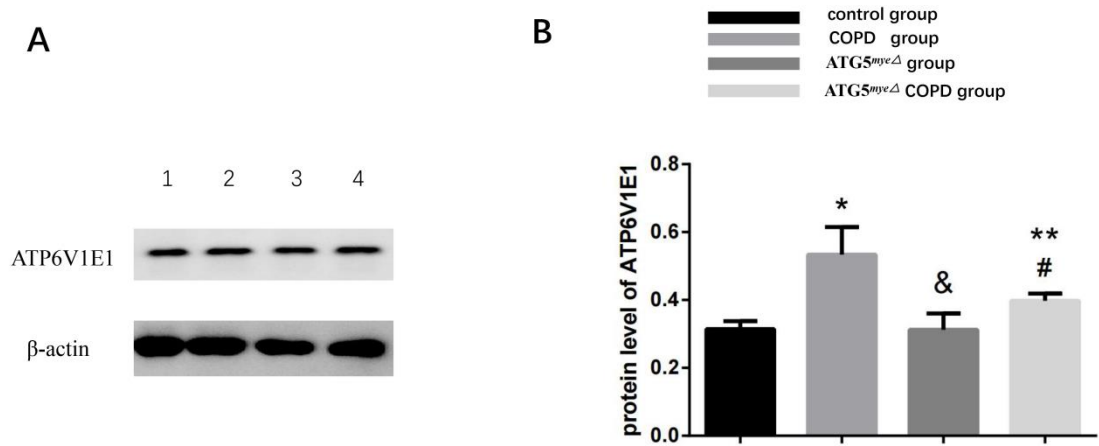

Figure 7: The expression level of ATP6V1E1 in COPD lung tissue, construction of ATG5<sup>mye</sup>Δ mice, fumigation combined with intraperitoneal injection of CSE method to construct COPD animal model, divided into control group, COPD group, ATG5<sup>mye</sup>Δ group and ATG5<sup>mye</sup>Δ COPD group, Western blot method to determine the expression of ATP6V1E1 in lung tissue of each group. Western blot was used to determine the expression of ATP6V1E1 in lung tissue. A: changes in ATP6V1E1 expression in lung tissues of mice in control group, COPD group, ATG5<sup>mye</sup>Δ group and ATG5<sup>mye</sup>Δ COPD group; B: quantitative changes in ATP6V1E1 expression in lung tissues of mice in control group, COPD group, ATG5<sup>mye</sup>Δ group, ATG5<sup>mye</sup>Δ COPD group. n=3 experiments, \*P < 0.05, compared with the control group; &P > 0.05, compared with the control group; \*\*P < 0.05, compared with the COPD group; #P < 0.05, compared with the ATG5<sup>mye</sup>Δ group.
